# Supplementary material for: Astragalus Polysaccharide Promotes Doxorubicin-Induced Apoptosis by Reducing O-GlcNAcylation in Hepatocellular Carcinoma
Source: MDPI journal article supplement (doi:10.3390/cells12060866), 2023-03-10
Supplement: s1 [file s1]

# Astragalus Polysaccharide Promotes Doxorubicin-Induced Apoptosis by Reducing O-GlcNAcylation in Hepatocellular Carcinoma

Mingzhe Li <sup>1,†</sup>, Fangfang Duan <sup>2,‡</sup>, Zhiqiang Pan <sup>1</sup>, Xiaomei Liu <sup>1</sup>, Wenli Lu <sup>1</sup>, Chao Liang <sup>1</sup>, Zhaoqin Fang <sup>1</sup>, Peike Peng <sup>1,\*‡</sup> and Dongwei Jia <sup>1,\*‡</sup>

<sup>1</sup> School of Basic Medical Sciences, Shanghai University of Traditional Chinese Medicine, Shanghai 201203, China

<sup>2</sup> Department of Pharmacology, School of Medicine, Sun Yat-sen University, Shenzhen 518107, China

\* Correspondence: pengpeike@shutcm.edu.cn (P.P.); jiadongwei@shutcm.edu.cn (D.J.); Tel.: +86-21-51322117 (D.J.).

† These authors contributed equally to this work.

‡ These authors contributed equally to this work.

**Table S1.** Primers for quantitative Real-Time PCR.

|         | Primer sequence (5' to 3')                                             |
|---------|------------------------------------------------------------------------|
| MDR1    | Forward: TAATGCGACAGGAGATAGGCT<br>Reverse: CCGCCATTGACTGAAAGAACAT      |
| OGT     | Forward: ATCCTCTTTCTCATGGCTTCAG<br>Reverse: AACTCACATATCCTACACGCAG     |
| OGA     | Forward: AGCCAAATGGTGACAAGGAAGTCTC<br>Reverse: GCTCCGACCAAGTATAACCATCC |
| GFPT1   | Forward: CGGGAAAGTCAAGATACCAGC<br>Reverse: CGTACACCAATCAACAGAGGG       |
| GNPNAT1 | Forward: TAGGCACCACTAAAAGACAGTG<br>Reverse: TGGCCACTATTTGCTTGTGA       |
| PGM3    | Forward: GAGGAACATGCCACCTGTTT<br>Reverse: CAAAGGCATCTTGTTCAGA          |
| UAP1    | Forward: TACATTTATTTCACTGCCCAATT<br>Reverse: TTGCAGCTGGAAGCATTTGT      |
| GAPDH   | Forward: TGCACCACCAACTGCTTAGC<br>Reverse: GGCATGGACTGTGGTCATGAG        |

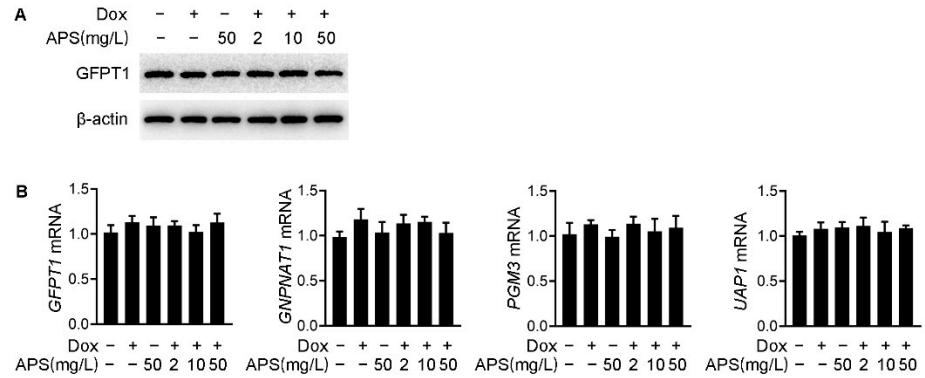

**Figure S1.** The effect of APS on the expression of HBP enzymes in Hep3B cells. Hep3B cells were treated with 1  $\mu$ M Dox along with or without increasing doses of APS (2, 10, 50 mg/L). (A) Protein level of GFAT1 was detected by Western blot.  $\beta$ -actin was used as an internal control. (B) mRNA levels of HBP enzymes (GFAT1, GNPAT1, PGM3, UAP1) were examined by real-time PCR. Data are expressed as mean  $\pm$  SEM from three independent experiments.

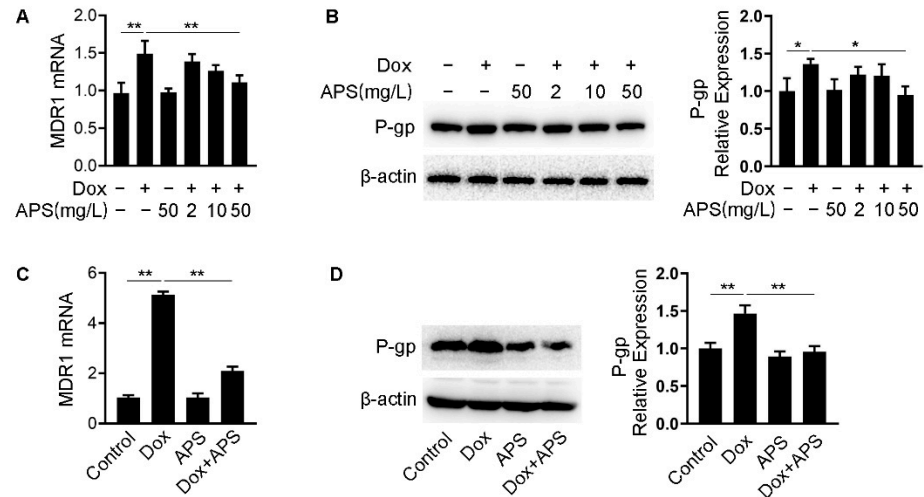

**Figure S2.** The effect of APS on the expression of MDR1 and P-glycoprotein (P-gp) in Hep3B cells or in xenograft tumor upon Dox treatment. Hep3B cells were treated with 1  $\mu$ M Dox along with or without increasing doses of APS (2, 10, 50 mg/L). mRNA level of MDR1 was measured by real-time PCR (A) and P-gp was detected by Western blot (B). The tumor tissues were harvest from xenograft tumor mice mentioned above. mRNA level of MDR1 was measured by real-time PCR (C) and P-gp was detected by Western blot (D).  $\beta$ -actin was used as an internal control. Data are expressed as mean  $\pm$  SEM from three independent experiments. \*,  $p < 0.05$ , \*\*,  $p < 0.01$ .
